# Supplementary material for: Photothermally boosted water splitting electrocatalysis by broadband solar harvesting nickel phosphide within a quasi-MOF
Source: Royal Society of Chemistry journal article supplement (doi:10.1039/d1ta02995a), 2021-01-01
Supplement: d1ta02995a1.pdf [file d1ta02995a1.pdf]

**Electronic Supplementary Information (ESI) for**  
**Photothermally Boosted Water Splitting Electrocatalysis by**  
**Broadband Solar Harvesting Nickel Phosphide within**  
**Quasi-MOF**

Lunhong Ai,<sup>a,b,‡</sup> Na Li,<sup>b,‡</sup> Mei Chen,<sup>a,b</sup> Huiling Jiang,<sup>a,b</sup> and Jing Jiang<sup>\*a,b</sup>

<sup>a</sup> College of Materials Science and Engineering, Chongqing Jiaotong University, Chongqing, 400074, China.

<sup>b</sup> Chemical Synthesis and Pollution Control Key Laboratory of Sichuan Province, College of Chemistry and Chemical Engineering, China West Normal University, Nanchong 637002, China

E-mail: 0826zjjh@163.com (J. Jiang)

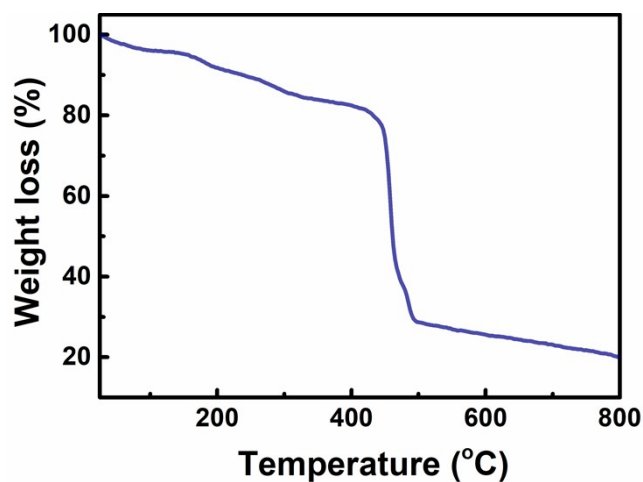

Fig. S1 TGA curve of the Ni-BDC under N<sub>2</sub> atmosphere.

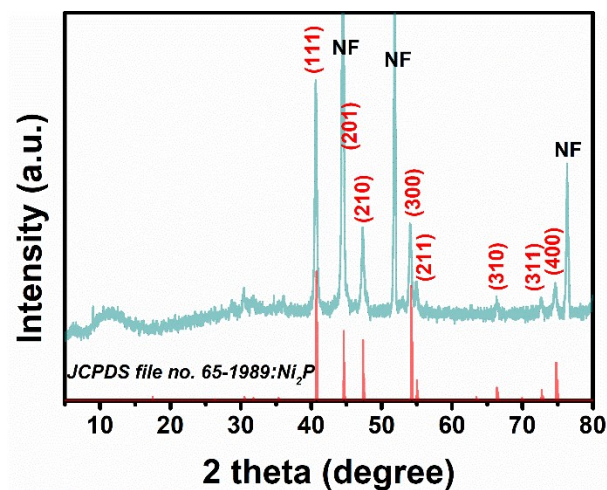

Fig. S2 XRD pattern of Ni<sub>2</sub>P@quasi-Ni-BDC/NF

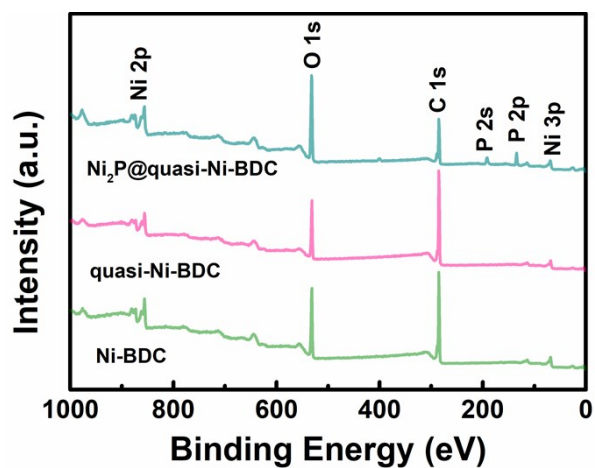

Fig. S3 Survey XPS spectra of Ni-BDC, quasi-Ni-BDC and Ni<sub>2</sub>P@quasi-Ni-BDC

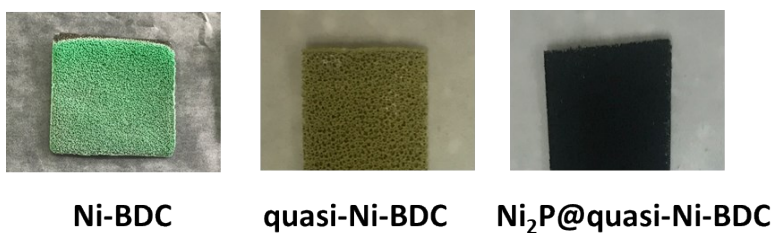

Fig. S4 Digital photographs of Ni-BDC/NF, quasi-Ni-BDC/NF and Ni<sub>2</sub>P@quasi-Ni-BDC/NF

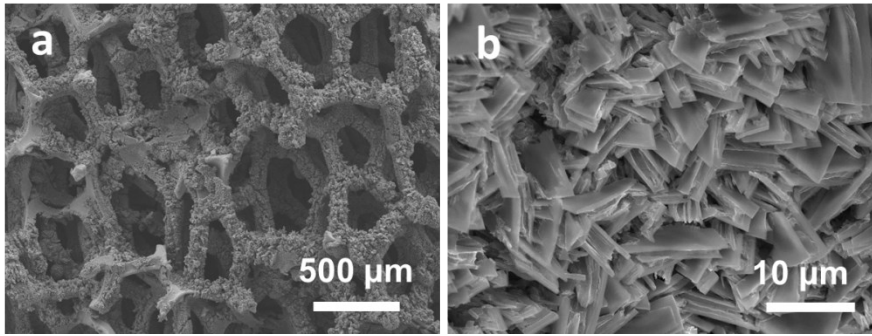

**Fig. S5** SEM images of Ni-BDC/NF

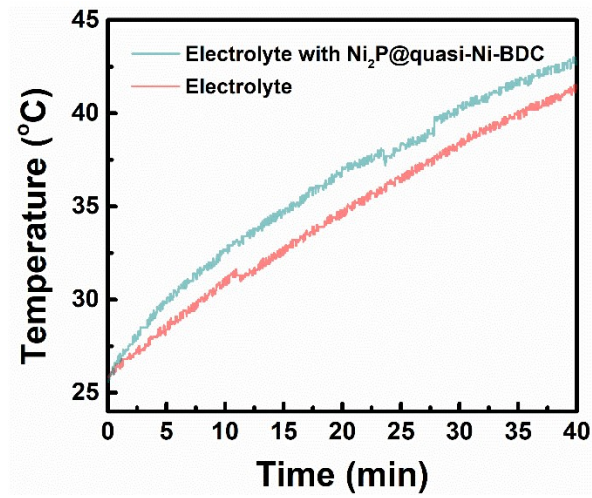

**Fig. S6** Temperature change curves of electrolyte with or without Ni<sub>2</sub>P@quasi-Ni-BDC/NF under light illumination

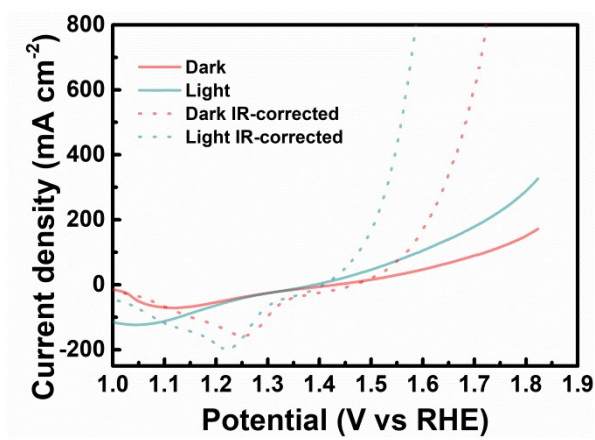

**Fig. S7** LSV curves of Ni<sub>2</sub>P@quasi-Ni-BDC/NF under dark and light illumination with and without iR compensation

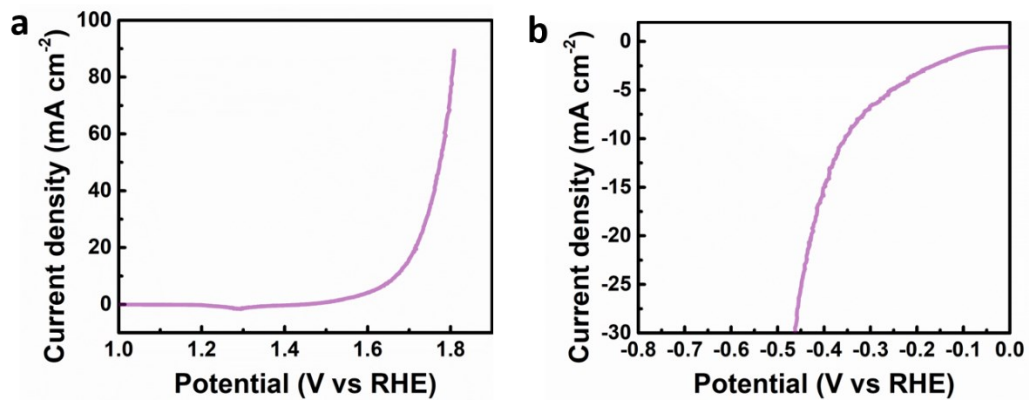

**Fig. S8** LSV curves of quasi-Ni-BDC/NF under dark: (a) OER and (b) HER

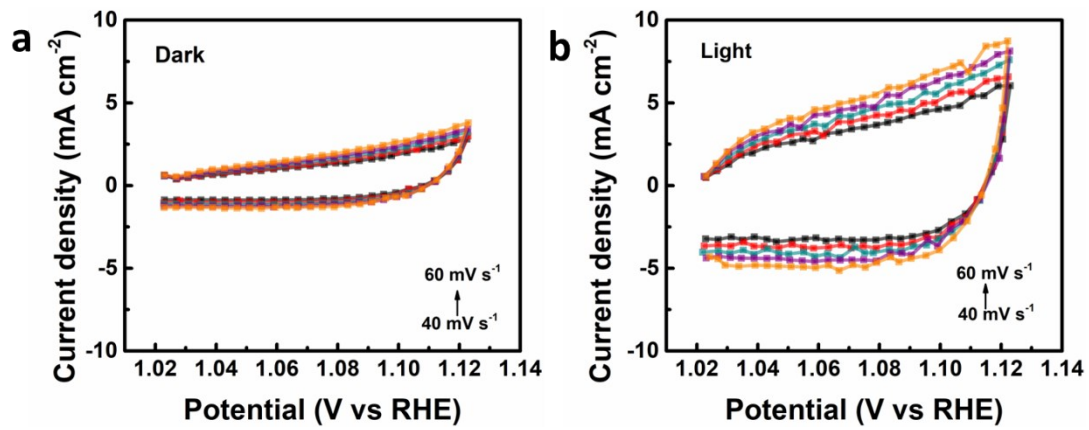

**Fig. S9** CVs of Ni<sub>2</sub>P@quasi-Ni-BDC/NF under dark (a) and light illumination (b) at scan rates of 40 to 60 mV s<sup>-1</sup> at 1.023 to 1.123 V vs RHE

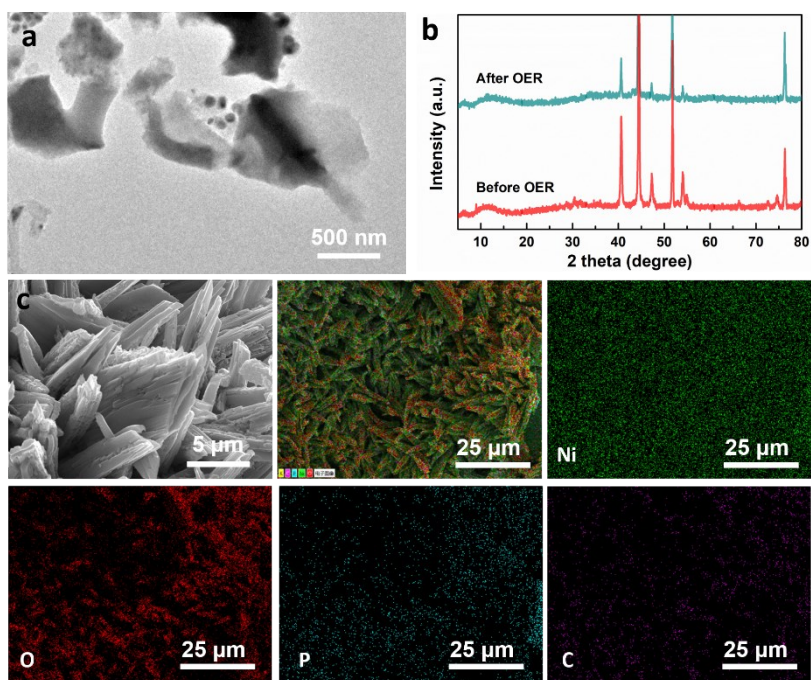

**Fig. S10** TEM image (a), XRD pattern (b) and SEM-EDS mapping images (c) of  $\text{Ni}_2\text{P}@$ quasi-Ni-BDC/NF after OER

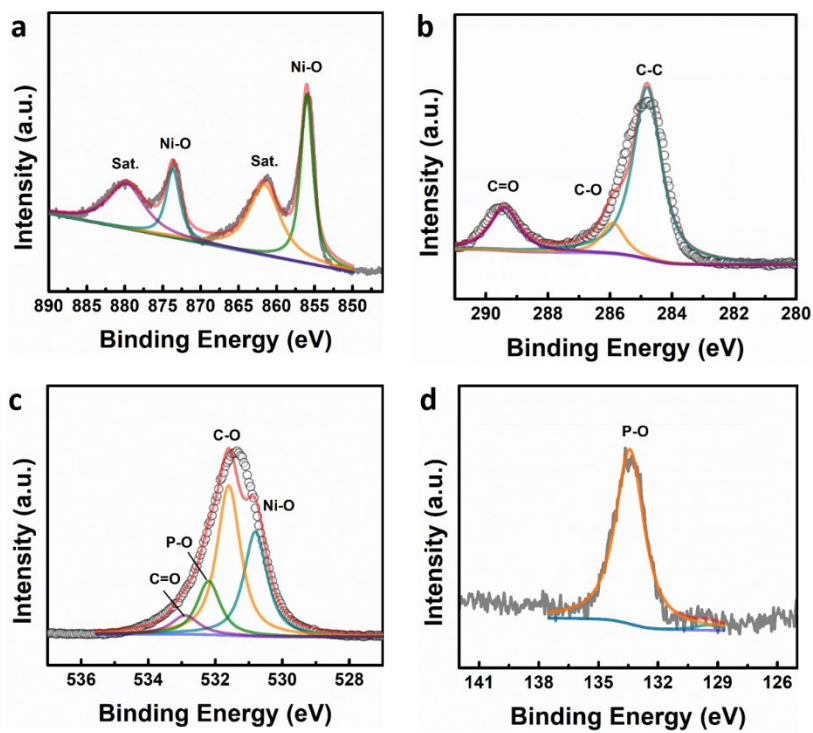

**Fig. S11** XPS spectra of  $\text{Ni}_2\text{P}@$ quasi-Ni-BDC after OER: (a) Ni 2p, (b) C 1s, (c) O 1s and P 2p



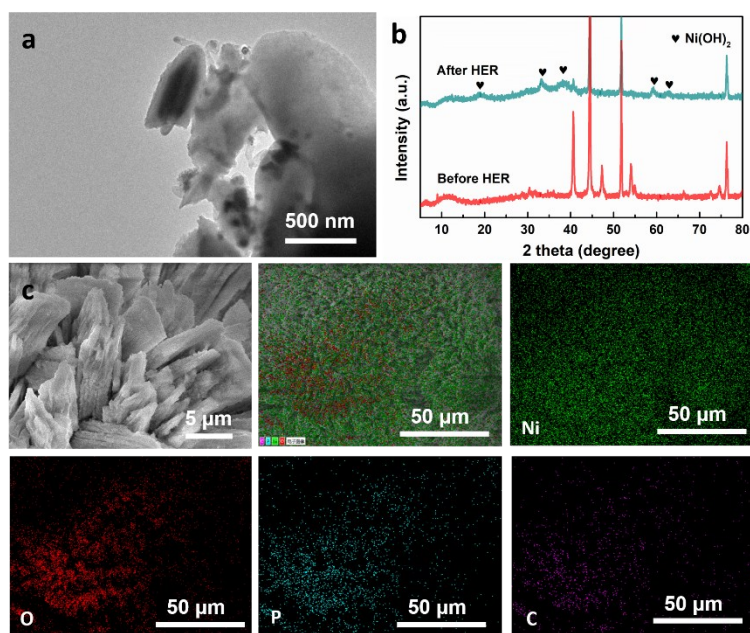

**Fig. S12** TEM image (a), XRD pattern (b) and SEM-EDS mapping images (c) of Ni<sub>2</sub>P@quasi-Ni-BDC/NF after HER

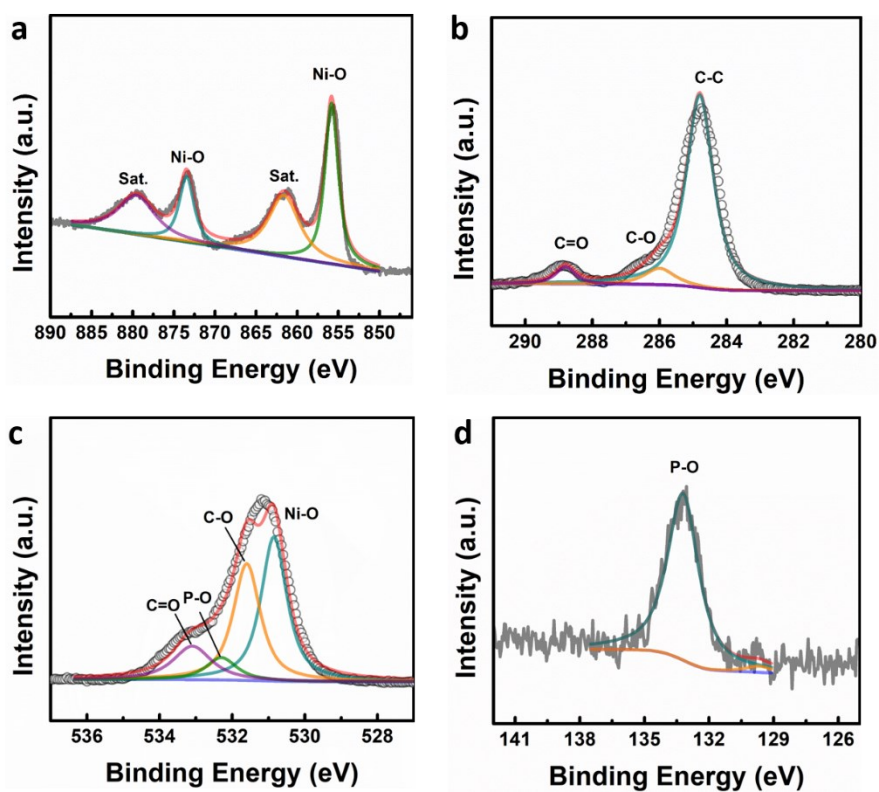

**Fig. S13** XPS spectra of Ni<sub>2</sub>P@quasi-Ni-BDC after HER: (a) Ni 2p, (b) C 1s, (c) O 1s and P 2p
